# Supplementary material for: Resistance to Haemonchus contortus in Corriedale sheep is associated to high parasite-specific IgA titer and a systemic Th2 immune response
Source: PubMed Central journal article supplement (PMC6925110; doi:10.1038/s41598-019-55447-6), 2019-12-20
Supplement: 41598_2019_55447_MOESM1_ESM.pdf [file 41598_2019_55447_MOESM1_ESM.pdf]

# Supplementary Figures

## **Resistance to *Haemonchus contortus* in Corriedale sheep is associated to high parasite-specific IgA titer and a systemic Th2 immune response**

**Cecilia Escribano<sup>1,2</sup>, Anderson Saravia<sup>2</sup>, Monique Costa<sup>1</sup>, Daniel Castells<sup>3</sup>, Gabriel Ciapesoni<sup>4</sup>, Franklin Riet-Correa<sup>2</sup> and Teresa Freire<sup>1\*</sup>**

<sup>1</sup>Grupo de Inmunomodulación y Desarrollo de Vacunas, Departamento de Inmunobiología, Facultad de Medicina, Universidad de La República, Montevideo, Uruguay.

<sup>2</sup>Plataforma de Salud Animal, Instituto Nacional de Investigación Agropecuaria, La Estanzuela, Uruguay.

<sup>3</sup>Secretariado Uruguayo de Lana, Florida, Uruguay.

<sup>4</sup>Programa Carne y Lana. Instituto Nacional de Investigación Agropecuaria, Las Brujas, Uruguay.

# Supplementary Figure S1

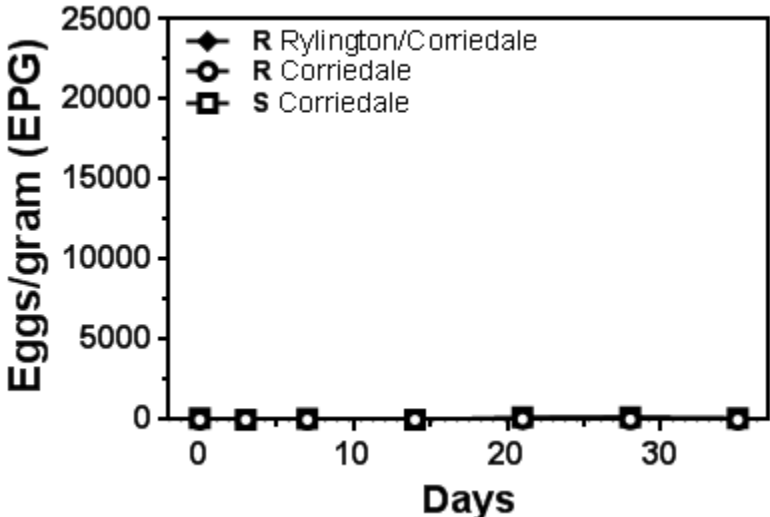

**Supplementary Figure S1. EPG from non infected sheep lines.** EPG from resistant and susceptible Corriedale and resistant Rylington x Corriedale (n=4) lambs that were not infected with *H. contortus* and remained to be used as control animals during the experiment.

# Supplementary Figure S2

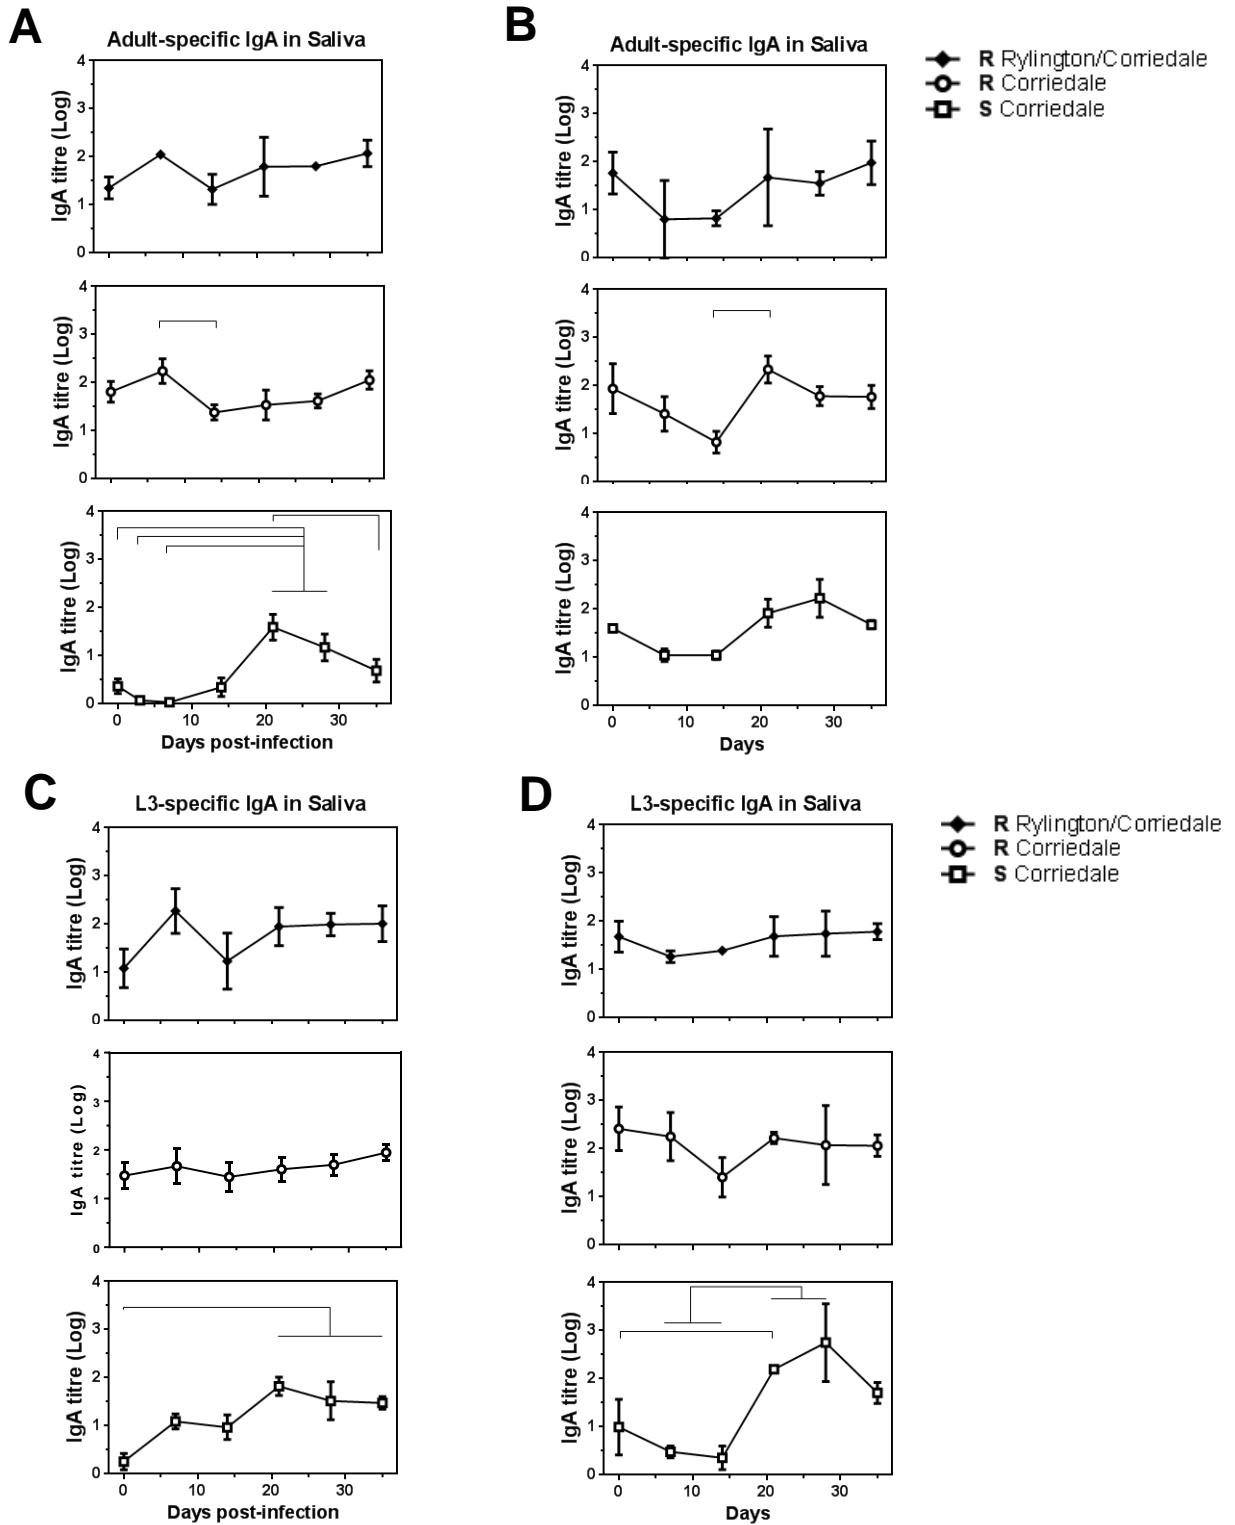

**Supplementary Figure S2. Significant differences during the infection for the parasite-specific IgA titers levels in saliva.** Saliva samples from infected (A, C) or control (B, D) susceptible and resistant Corriedale and resistant Rylington x Corriedale lambs were incubated with larvae (A, B) or adult (C, D) derived-antigen coated plates. Specific antibodies were detected with anti-sheep IgA HRP-conjugated antibody.

# Supplementary Figure S3

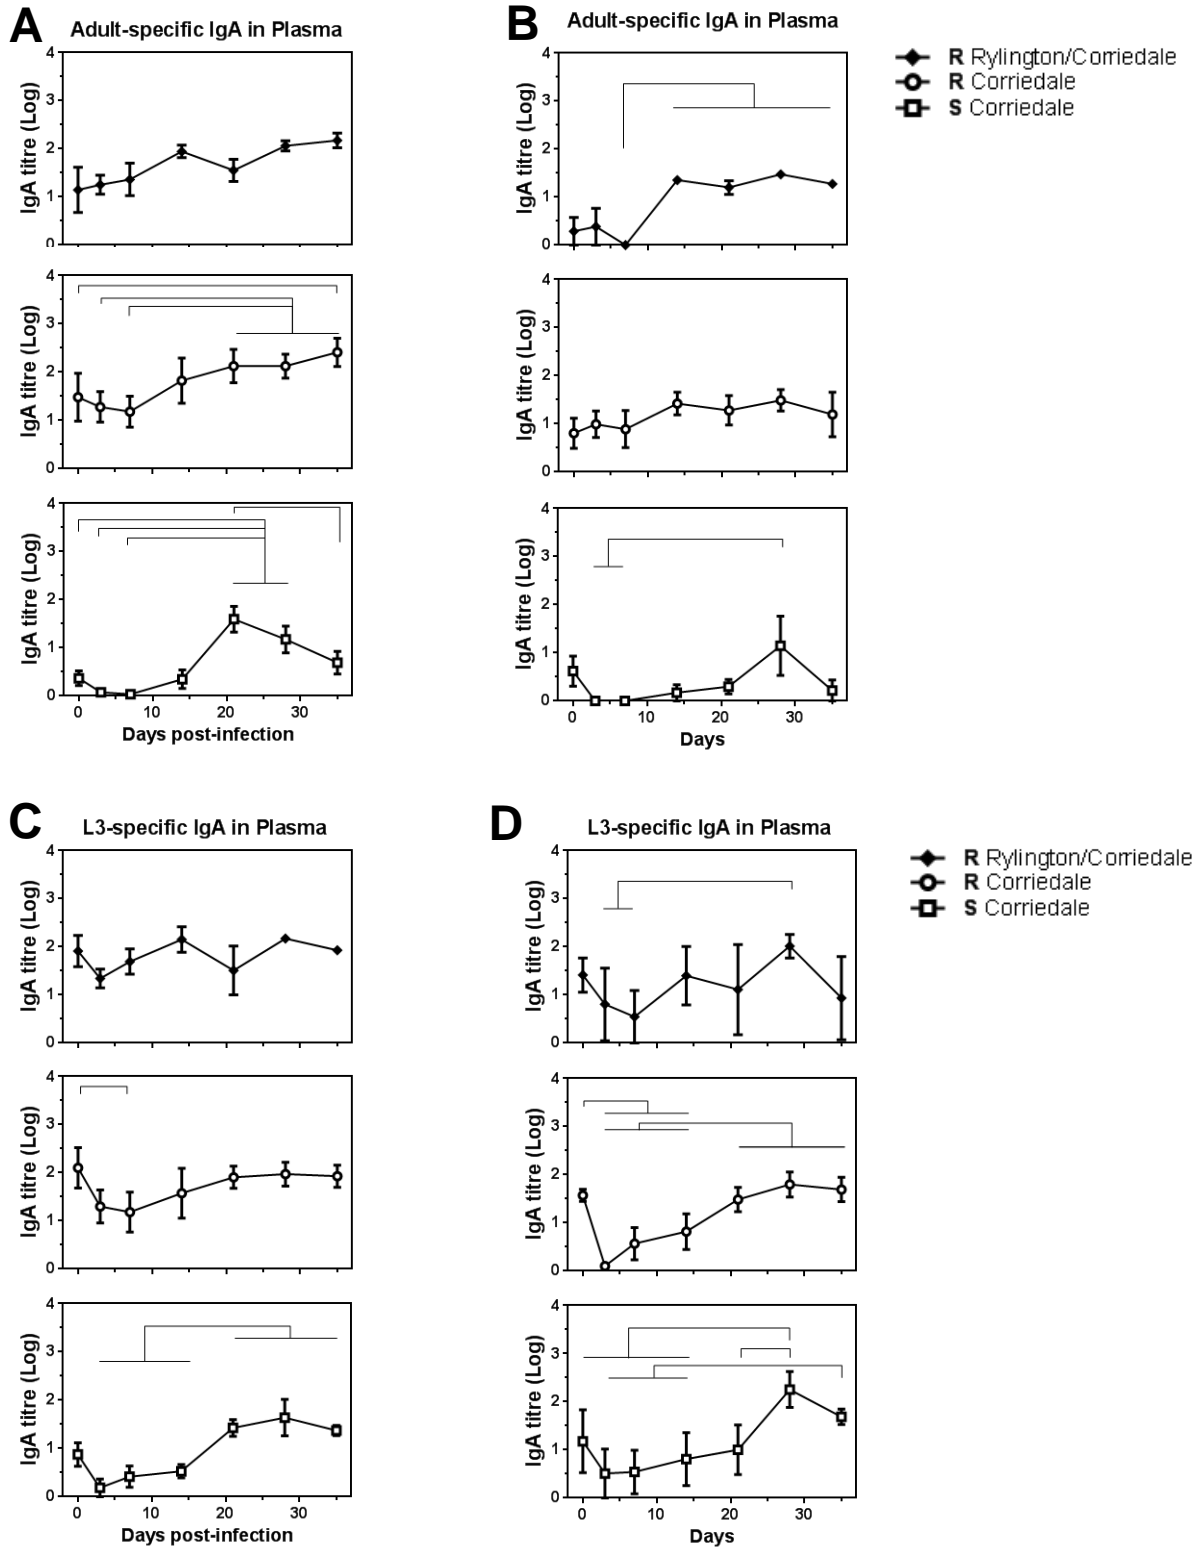

**Supplementary Figure S3. Significant differences during the infection for the parasite-specific IgA titers levels in plasma.** Saliva samples from infected (A, C) or control (B, D) susceptible and resistant Corriedale and resistant Rylington x Corriedale lambs were incubated with larvae (A, B) or adult (C, D) derived-antigen coated plates. Specific antibodies were detected with anti-sheep IgA HRP-conjugated antibody.

# Supplementary Figure S4

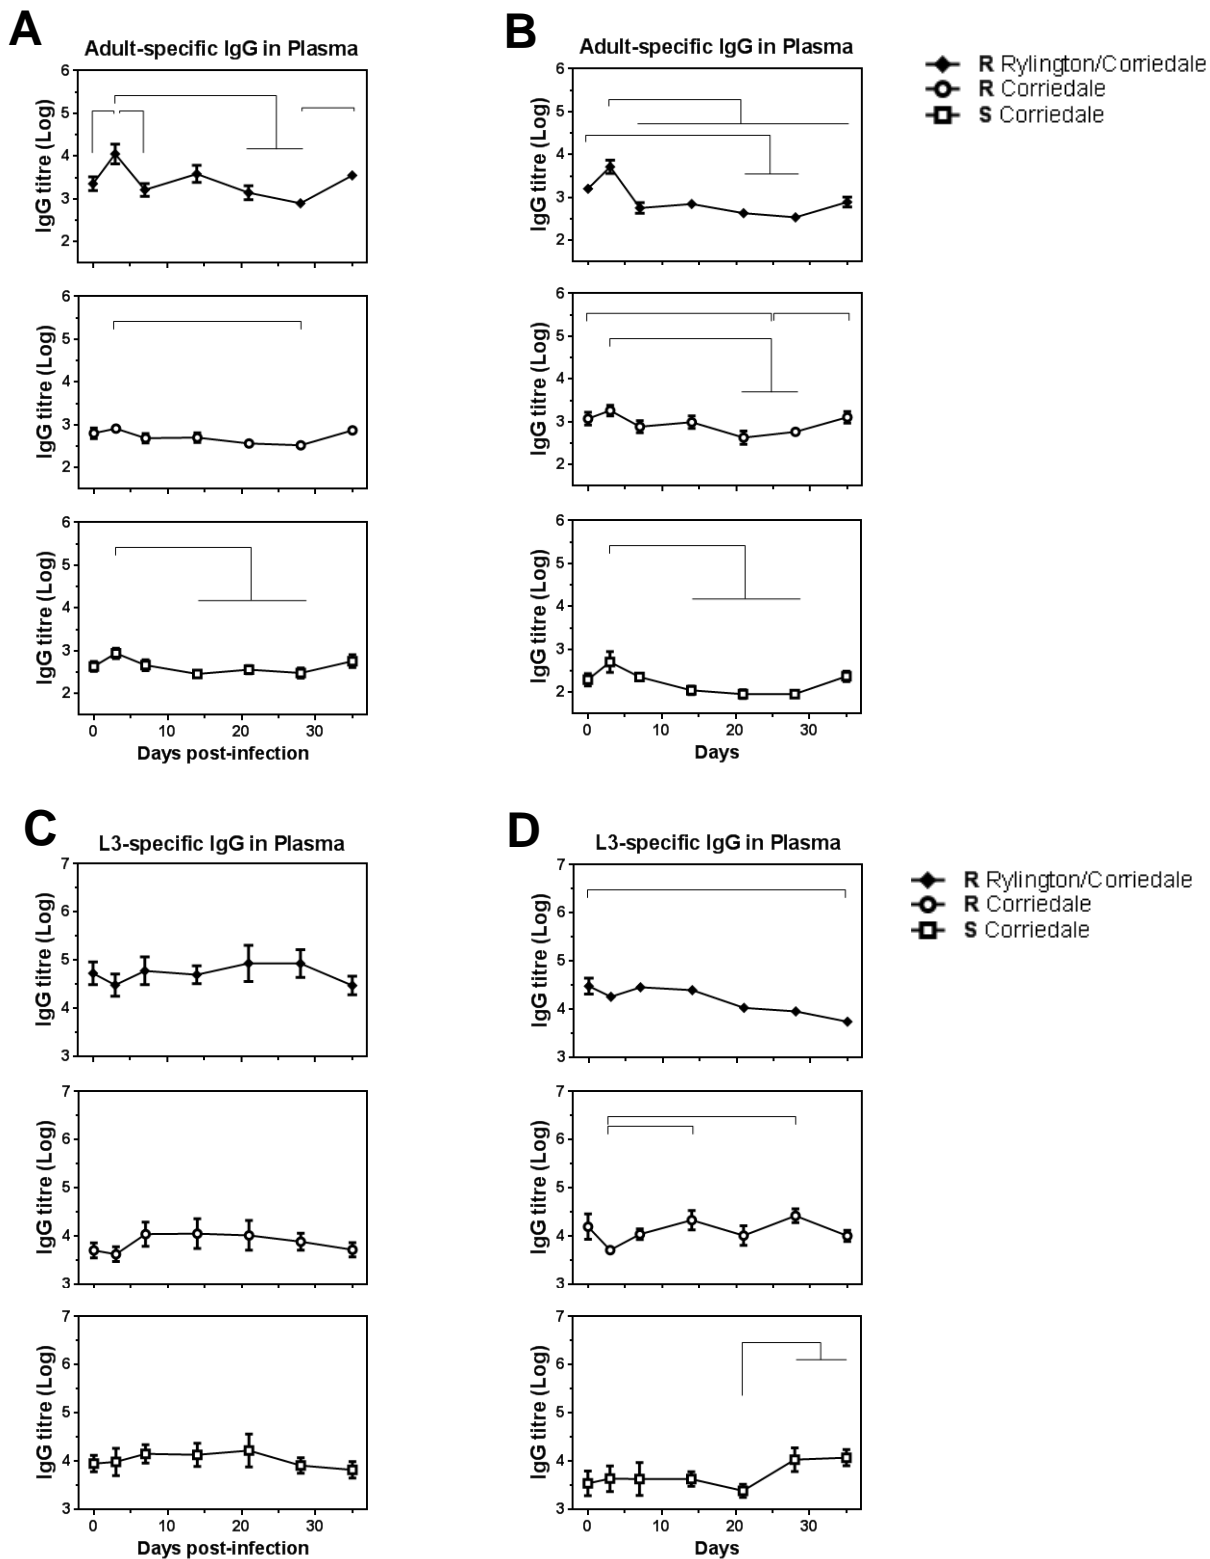

**Supplementary Figure S4. Significant differences during the infection for the parasite-specific IgG titers levels in plasma.** Saliva samples from infected (A, C) or control (B, D) susceptible and resistant Corriedale and resistant Rylington x Corriedale lambs were incubated with larvae (A, B) or adult (C, D) derived-antigen coated plates. Specific antibodies were detected with anti-sheep IgA HRP-conjugated antibody.

# Supplementary Figure S5

Day 35

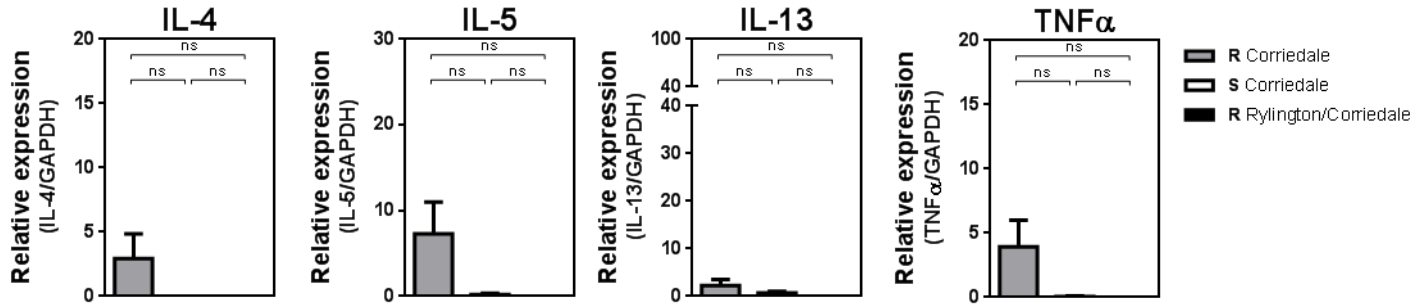

**Supplementary Figure S5. Type-2 cytokine levels produced by PBMC from control animals.** PBMCs from non infected susceptible and resistant Corriedale and resistant Rylington x Corriedale lambs obtained at 35 days after infection were stimulated with adult-derived parasite antigens for 5 days. Copy DNA from these cells was used as a template to determine cytokine mRNA levels by qRT-PCR. Results are shown as the ratio of mRNA amplification for a specific cytokine and the GAPDH  $\pm$  SEM.
